# Supplementary material for: Functional Enhancers at the Gene-Poor 8q24 Cancer-Linked Locus
Source: PubMed Central journal article supplement (PMC2717370; doi:10.1371/journal.pgen.1000597), 2009-08-14
Supplement: pgen.1000597.s001.pdf [file pgen.1000597.s001.pdf]

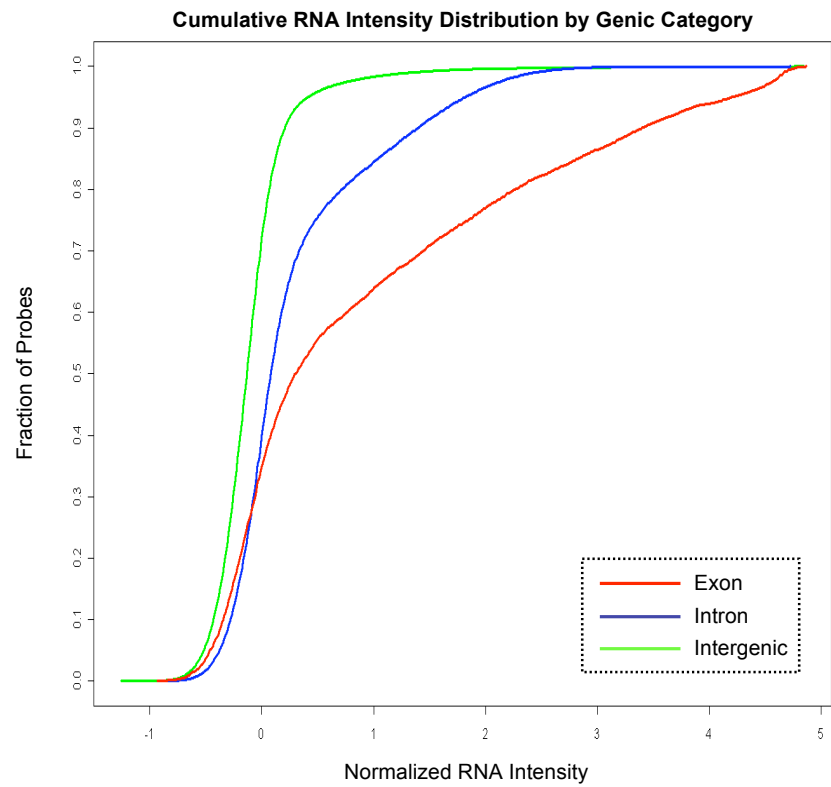

**Fig S1**
